# Supplementary material for: Exposure of Cultured Hippocampal Neurons to the Mitochondrial Uncoupler Carbonyl Cyanide Chlorophenylhydrazone Induces a Rapid Growth of Dendritic Processes
Source: MDPI journal article supplement (doi:10.3390/ijms241612940), 2023-08-18
Supplement: s1 [file s1]

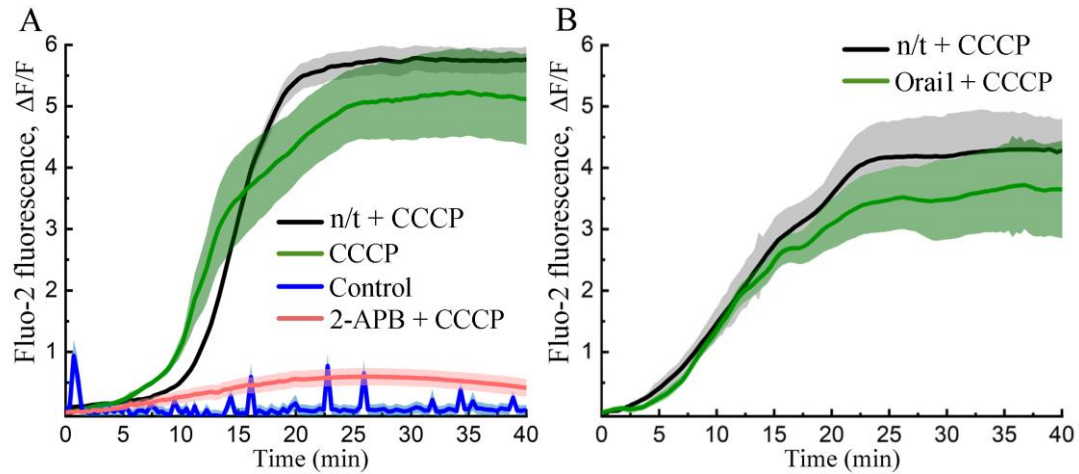

**Supplementary Figure S1. Transfection does not affect  $[Ca^{2+}]_i$  in control and CCCP treatment.** **A.** The effect of 2-APB ( $n = 16$  cells, carrot curve) on  $[Ca^{2+}]_i$  following CCCP. Control transfected cells (eBFP) with CCCP:  $n = 15$  cells, green curve; control non-transfected (n/t) cells with CCCP:  $n = 20$  cells, black curve; blue: non-transfected untreated cells:  $n = 35$  cells. Data are presented as mean  $\pm$  SEM (shadows) from three cell cultures, DIV 10-14. Note that in the absence of CCCP, control cells (blue) express spontaneous calcium transients. **B.** Cells transfected with eBFP, Orail and with cytosolic calcium indicator (green curve,  $n = 15$ ) and n/t cells in the same field (black curve,  $n=16$ ) with CCCP treatment.

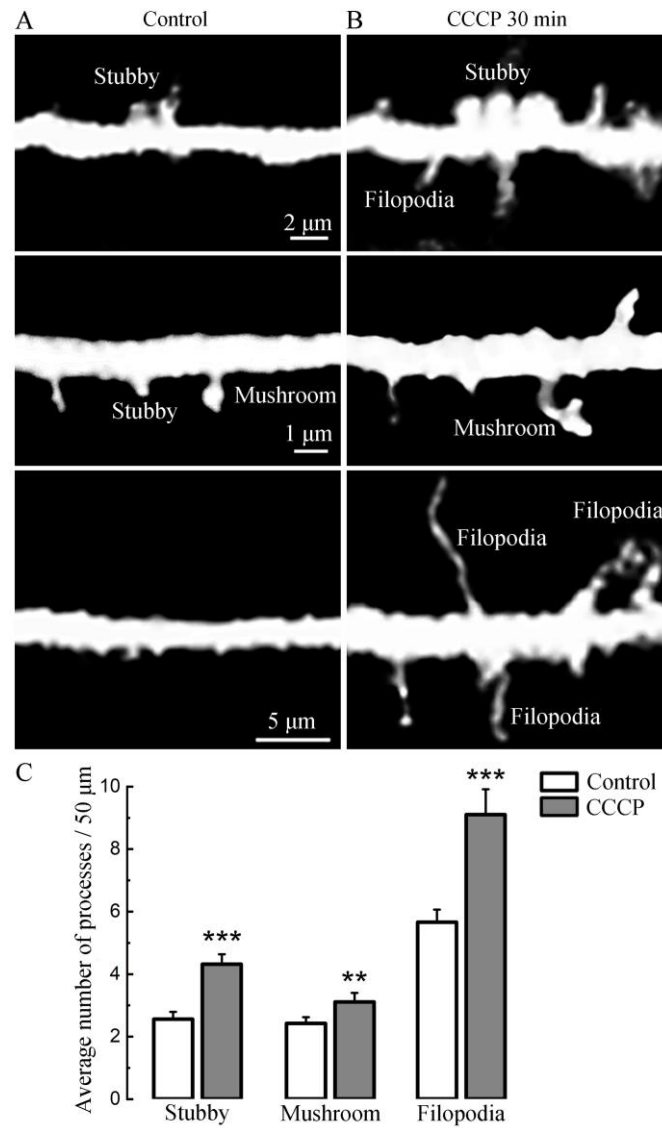

**Supplementary Figure S2. A&B.** Examples of dendritic areas transfected with eBFP (monochrome) in control (A) and after 30 minutes with CCCP treatment (B). **C.** Averages number of dendritic processes (filopodia, mushroom and stubby spines) detected with eBFP: control stubby / 30 min CCCP stubby  $2.55 \pm 0.23 / 4.23 \pm 0.3$  \*\*\*,  $p < 0.001$ ; control mushroom spines / 30 min CCCP mushroom spines  $2.48 \pm 0.22 / 3.32 \pm 0.27$  \*\*,  $p < 0.01$ ; control filopodia / 30 min CCCP filopodia  $5.57 \pm 0.37 / 8.34 \pm 0.69$  \*\*\*,  $p < 0.001$ ;  $n = 20$  cells from four cell cultures 10-14 DIV, a comparable number of dendritic sections, 50  $\mu$ m long, were analyzed for each cell,  $t$ -tests.

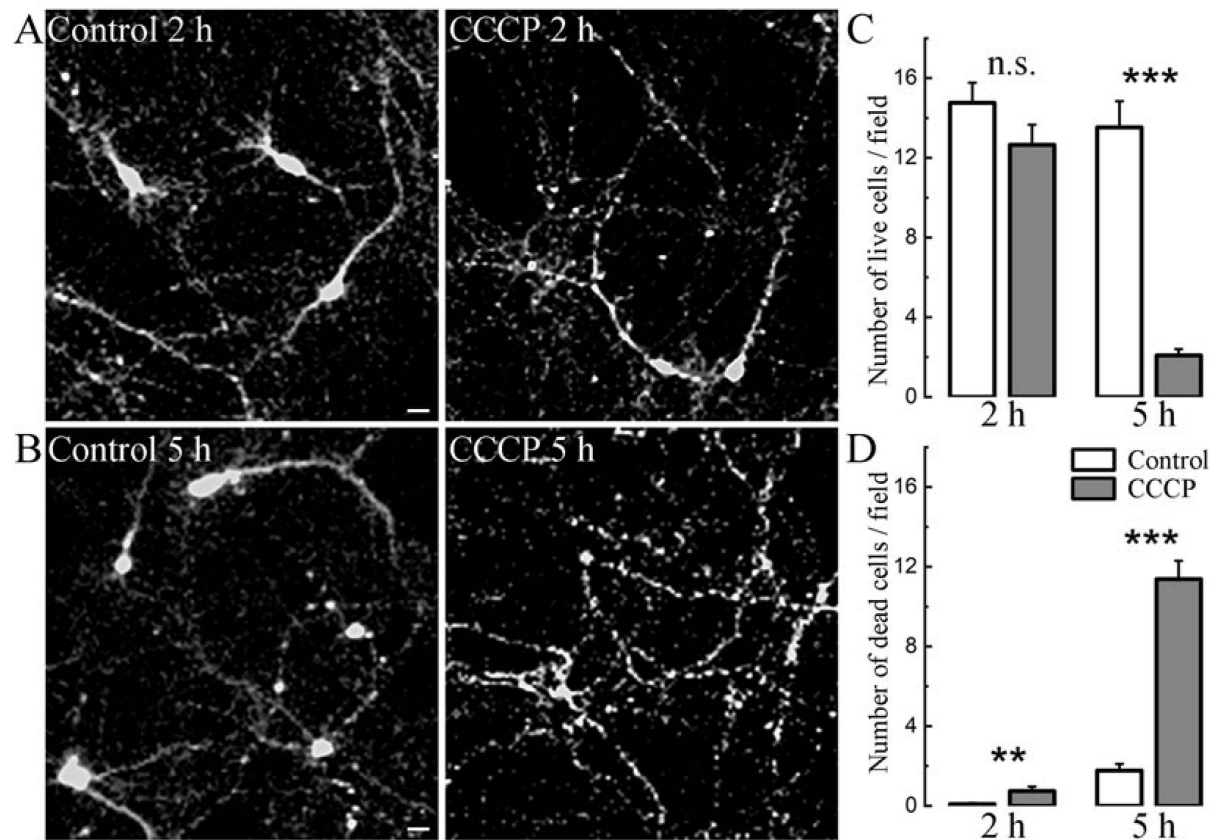

**Supplementary Figure S3. A&B.** imaging in CCCP-containing medium, EGFP (Scale bar 10  $\mu$ m). **C.** Number of living cells in control medium (n = 34 fields / 17 fields) and with CCCP (n = 35 fields / 24 fields) after 2 and 5 hours of imaging. Control 2 h / CCCP 2 h: n.s.; Control 5 h / CCCP 5 h: \*\*\*,  $p < 0.001$ . **D.** Number of dead cells in control medium and with CCCP after 2 and 5 hours of imaging. Control 2 h / CCCP 2 h: \*\*,  $p < 0.01$ ; Control 5 h / CCCP 5 h: \*\*\*,  $p < 0.001$ . Same fields for C and D, two cell cultures,  $t$ -tests.
